# Supplementary figures and images for: A Cryptochrome 2 mutation yields advanced sleep phase in humans
Source: eLife journal article supplement (doi:10.7554/elife.16695), 2016-08-16

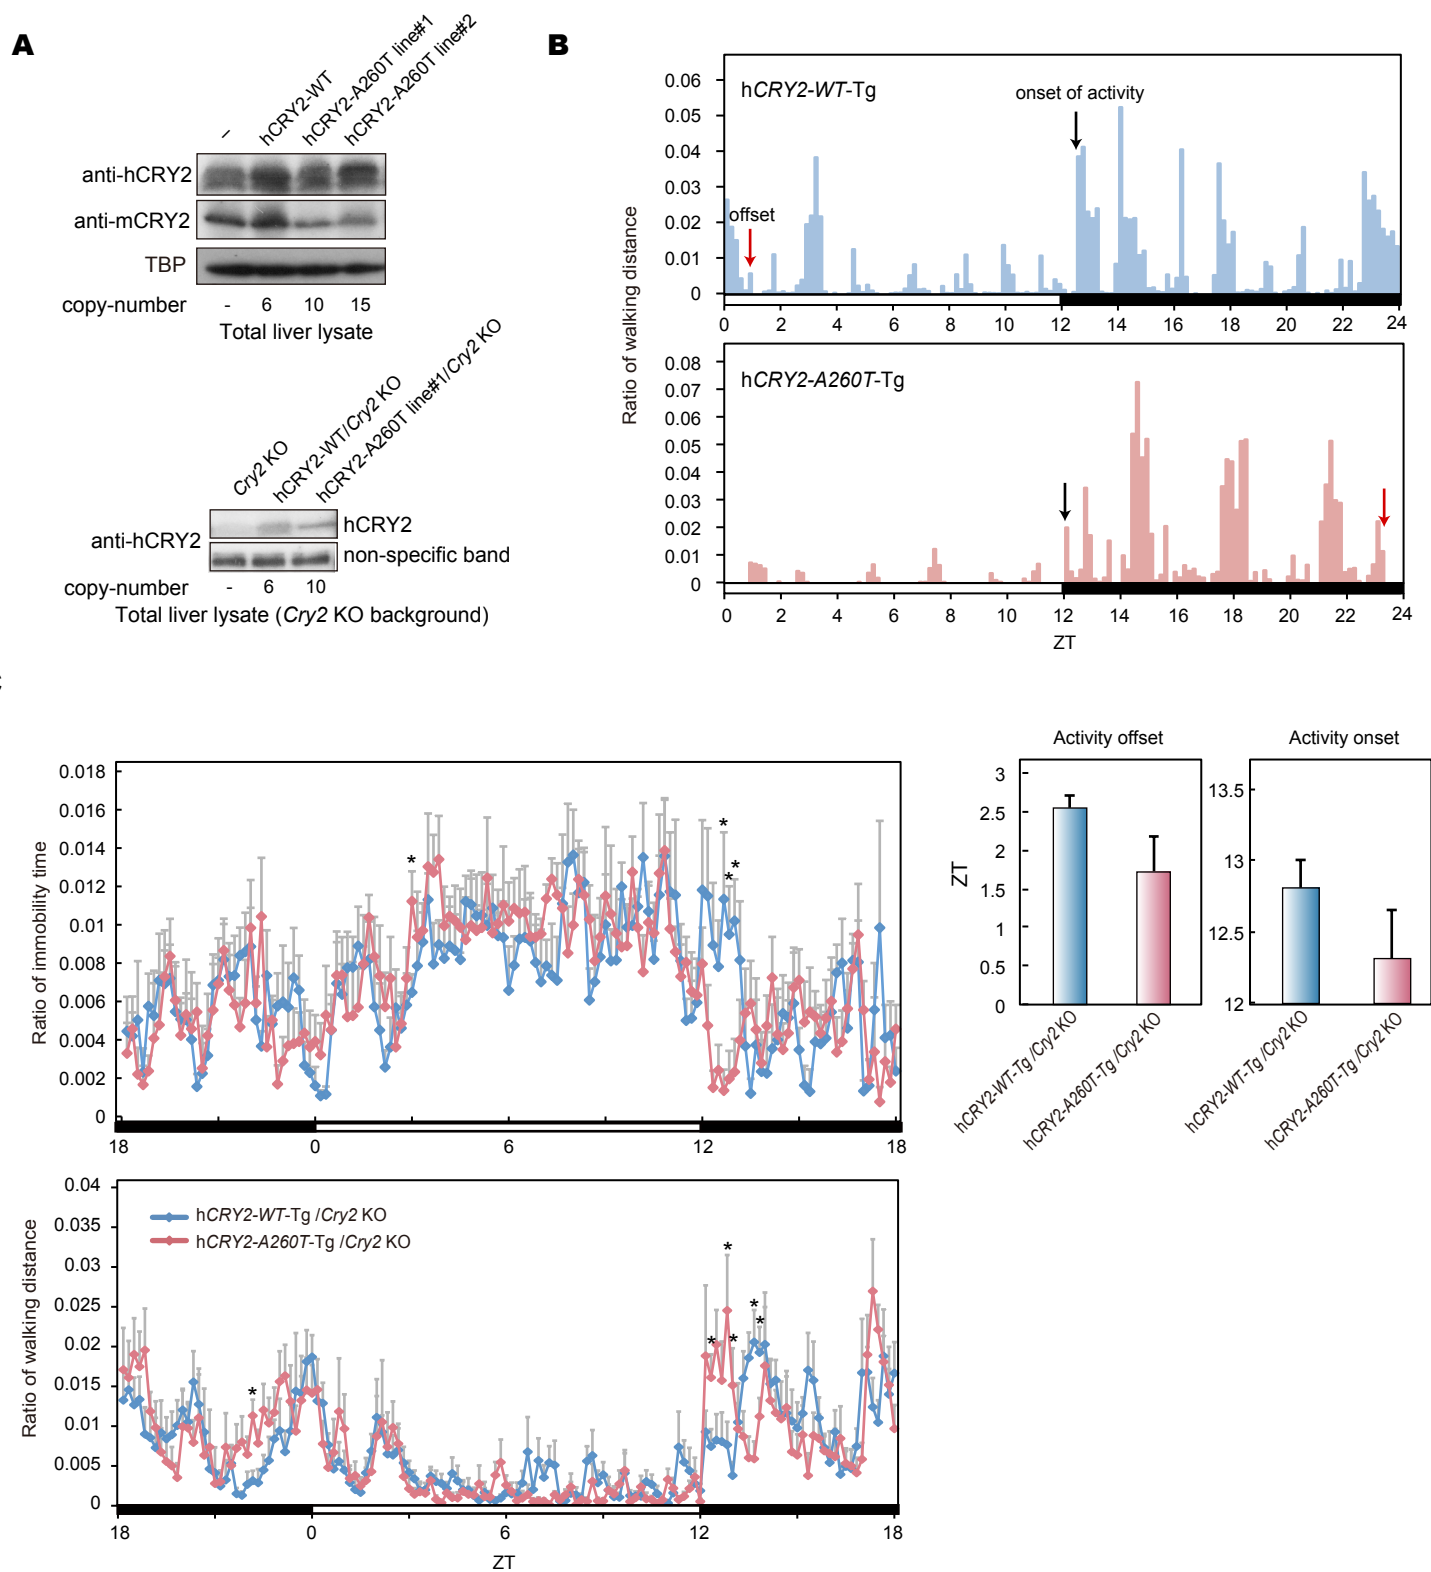

**Figure 2-Supplement 1**

Supplement: supp [file elife_poa_e16695_Figure2_Supplement1.pdf › elife_poa_e16695_Figure2_Supplement1.pdf]

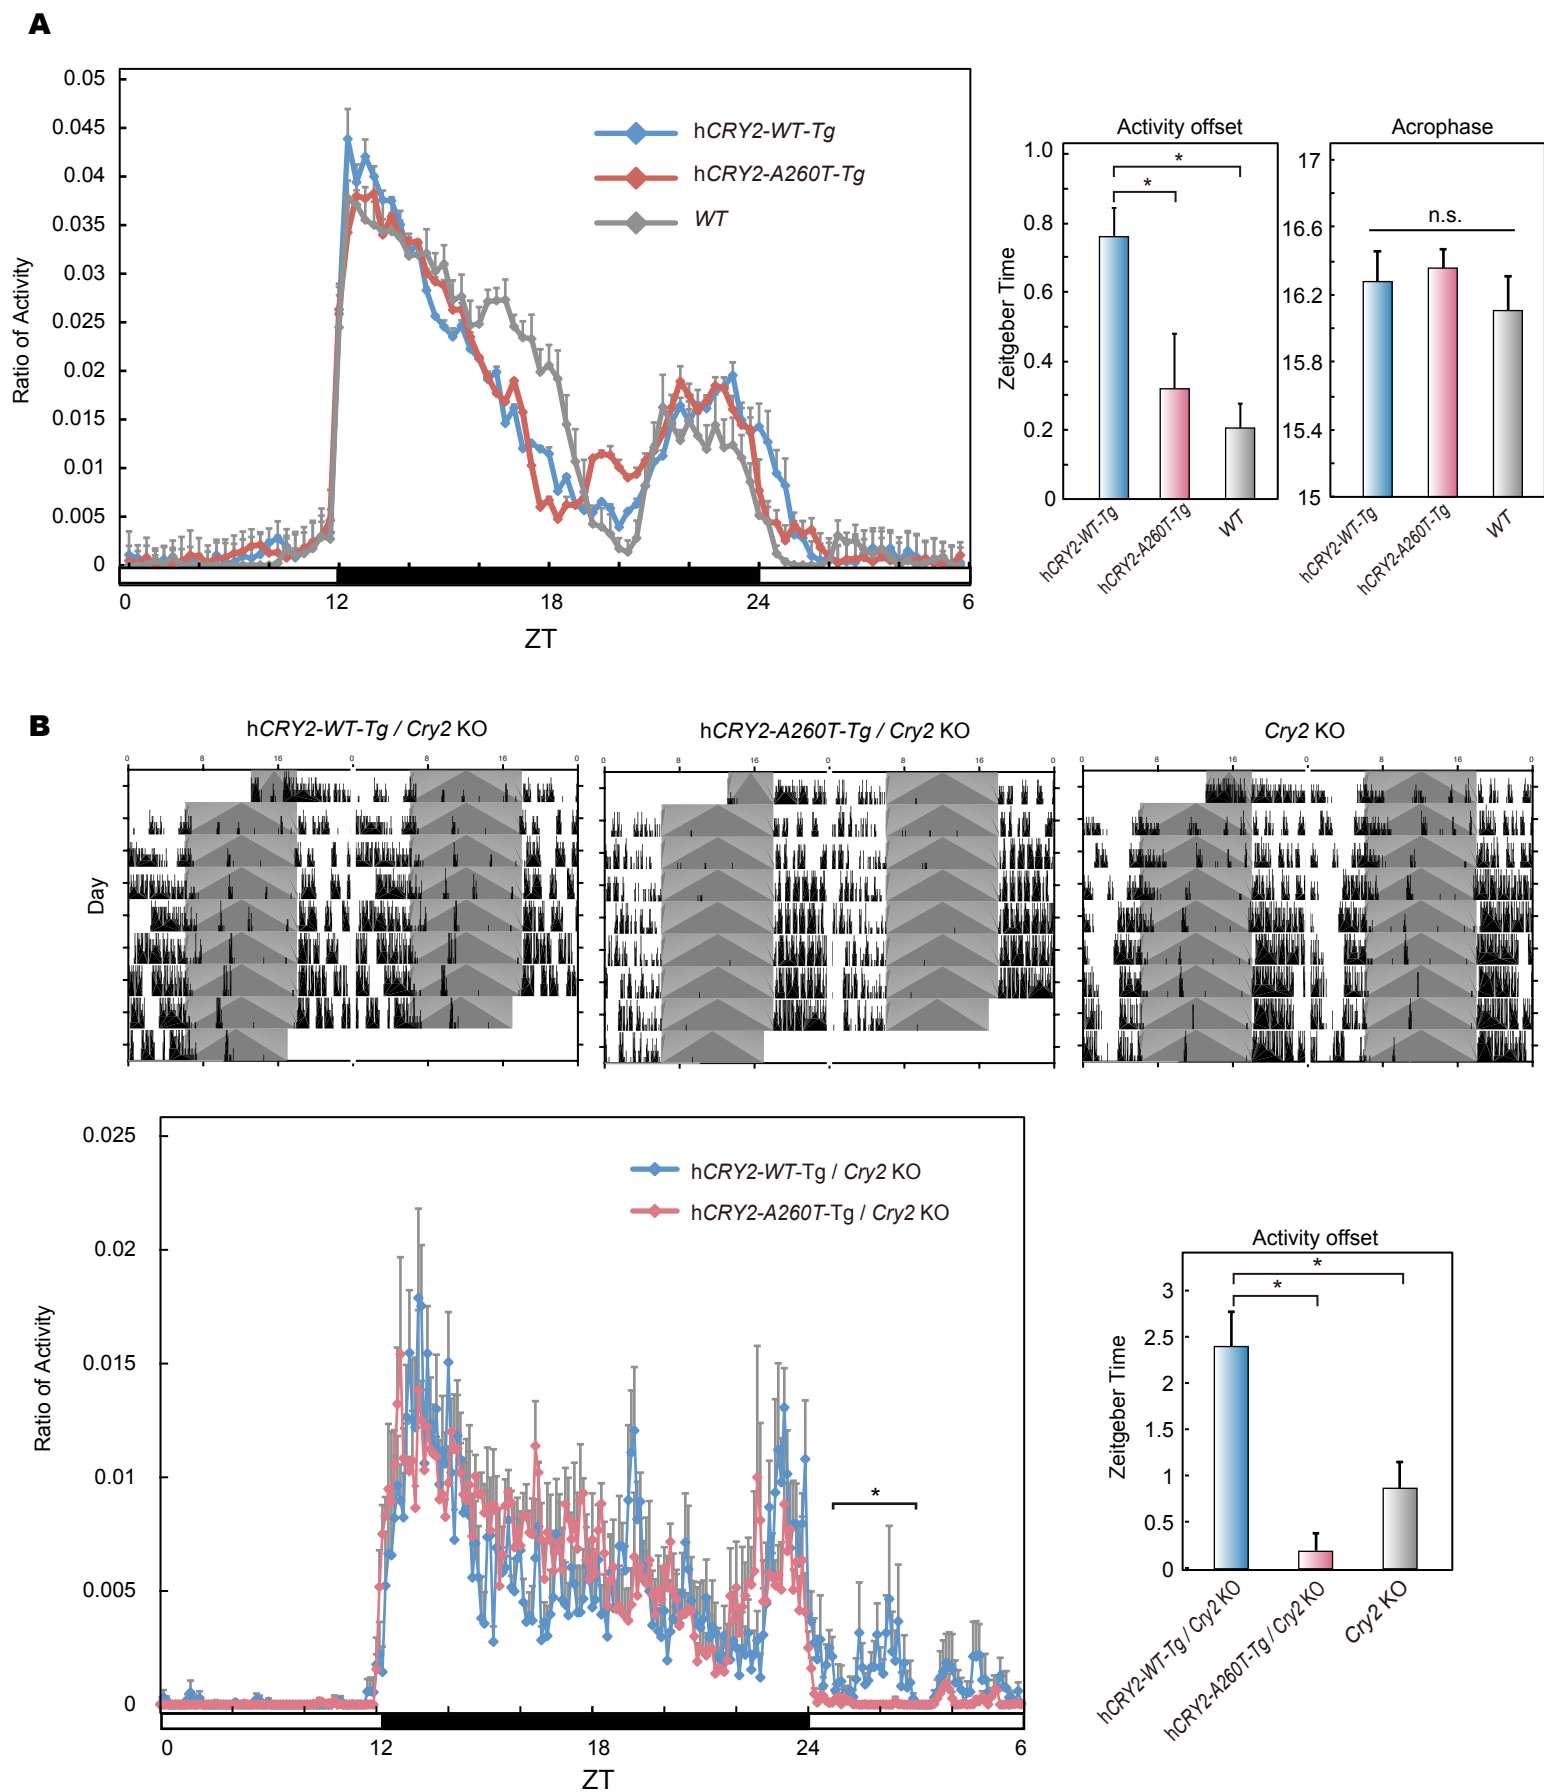

**Figure 2-Supplement 2**

Supplement: supp [file elife_poa_e16695_Figure2_Supplement2.pdf › elife_poa_e16695_Figure2_Supplement2.pdf]

**A**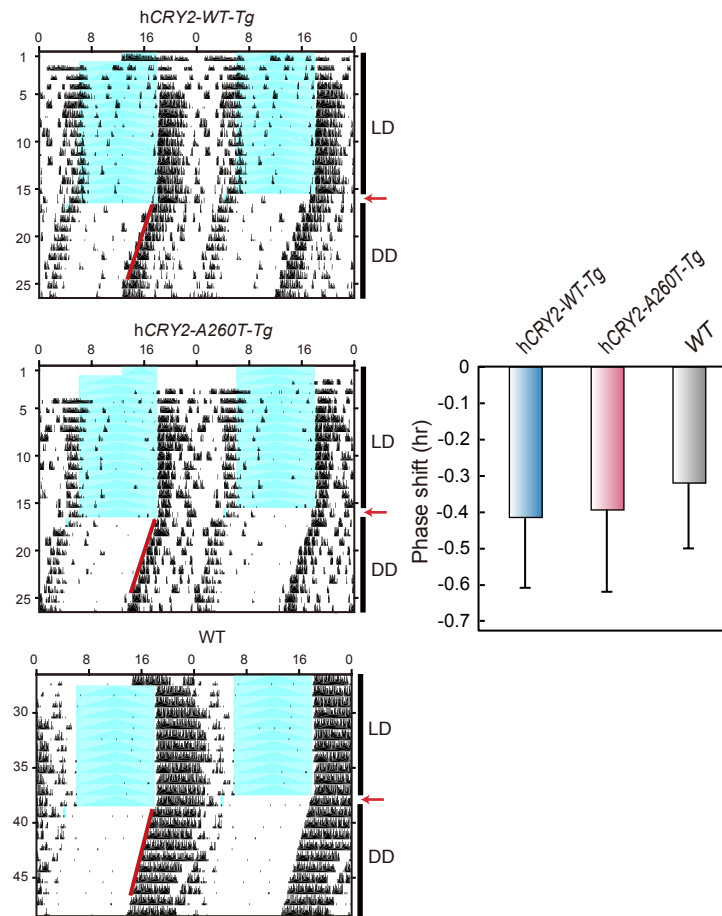**Figure 2 - supplement 3**

Supplement: supp [file elife_poa_e16695_Figure2_Supplement3.pdf › elife_poa_e16695_Figure2_Supplement3.pdf]

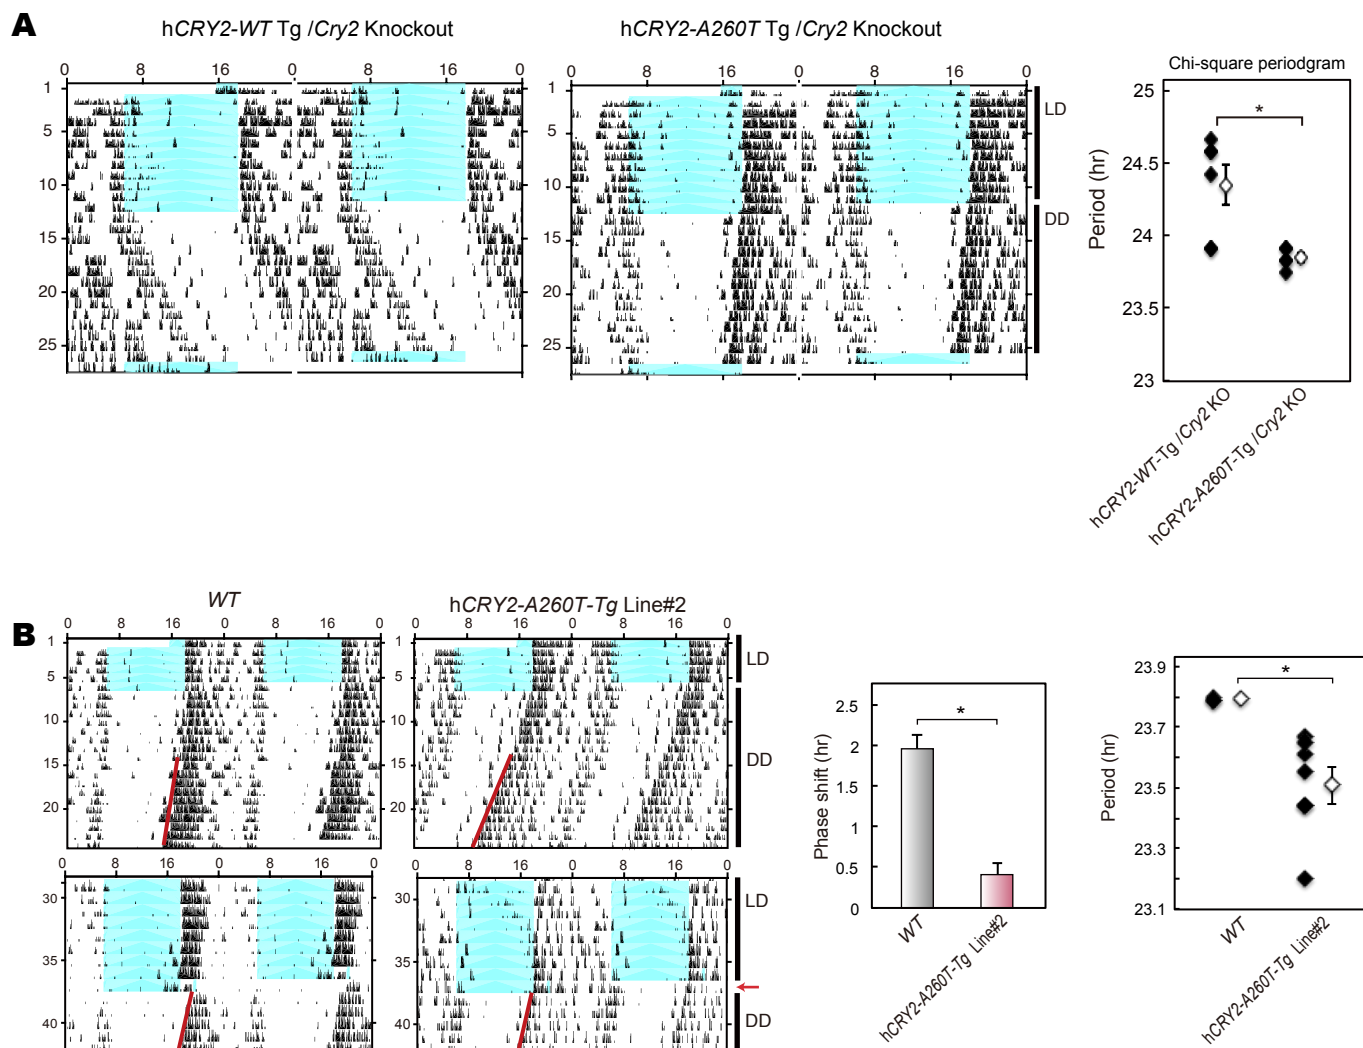

**Figure 2 - supplement 4**

Supplement: supp [file elife_poa_e16695_Figure2_Supplement4.pdf › elife_poa_e16695_Figure2_Supplement4.pdf]

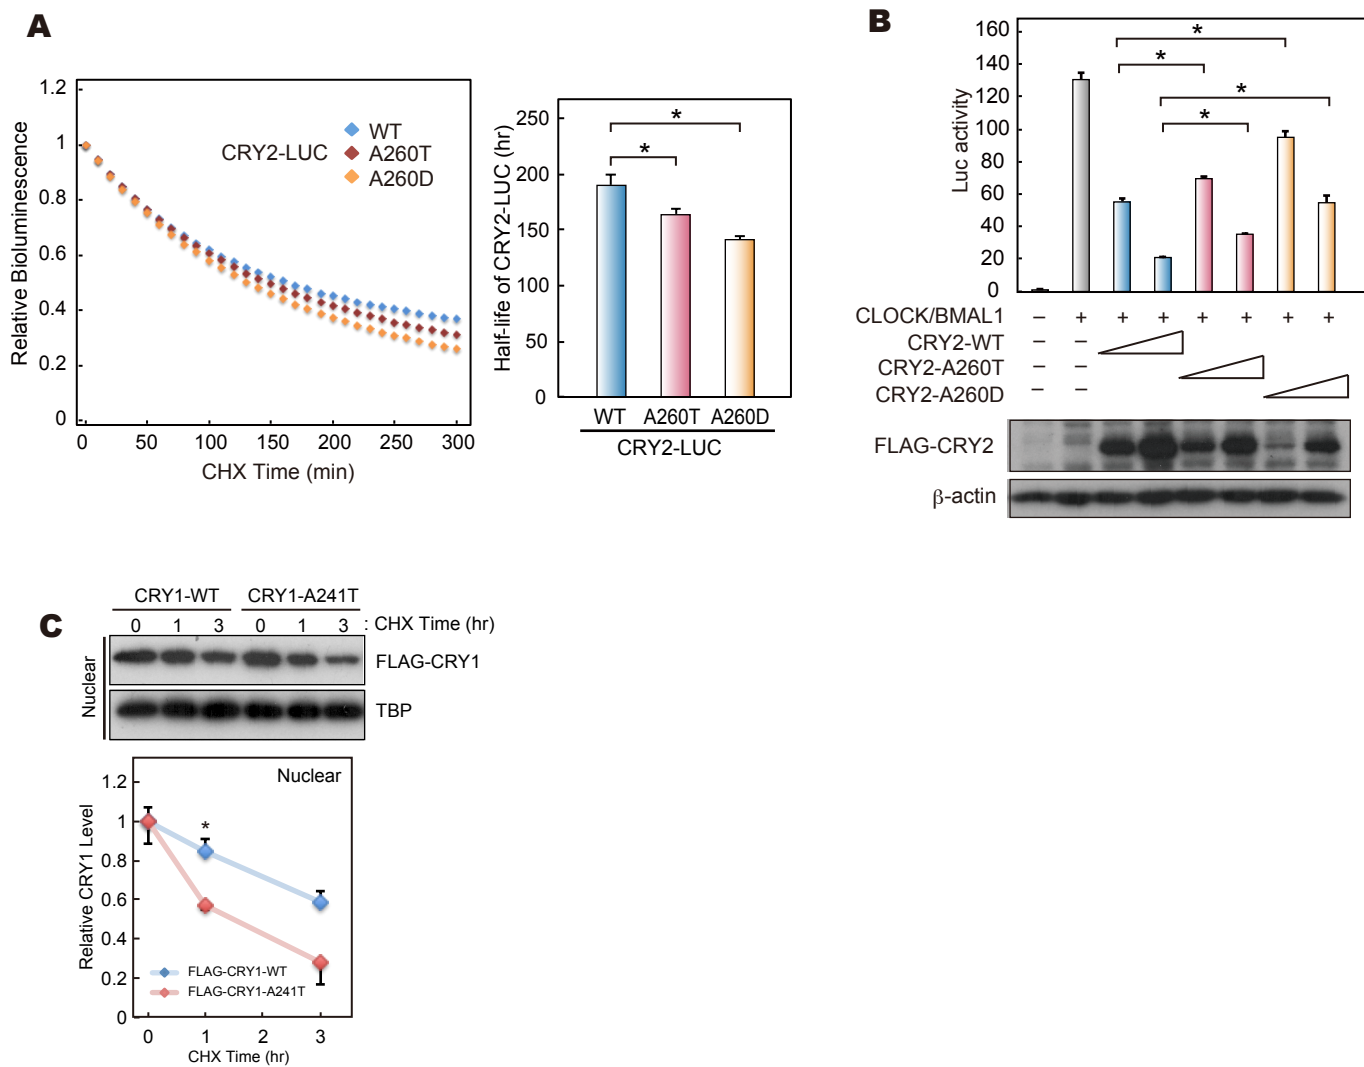

**Figure 4 - supplement 1**

Supplement: supp [file elife_poa_e16695_Figure4_Supplement1.pdf › elife_poa_e16695_Figure4_Supplement1.pdf]

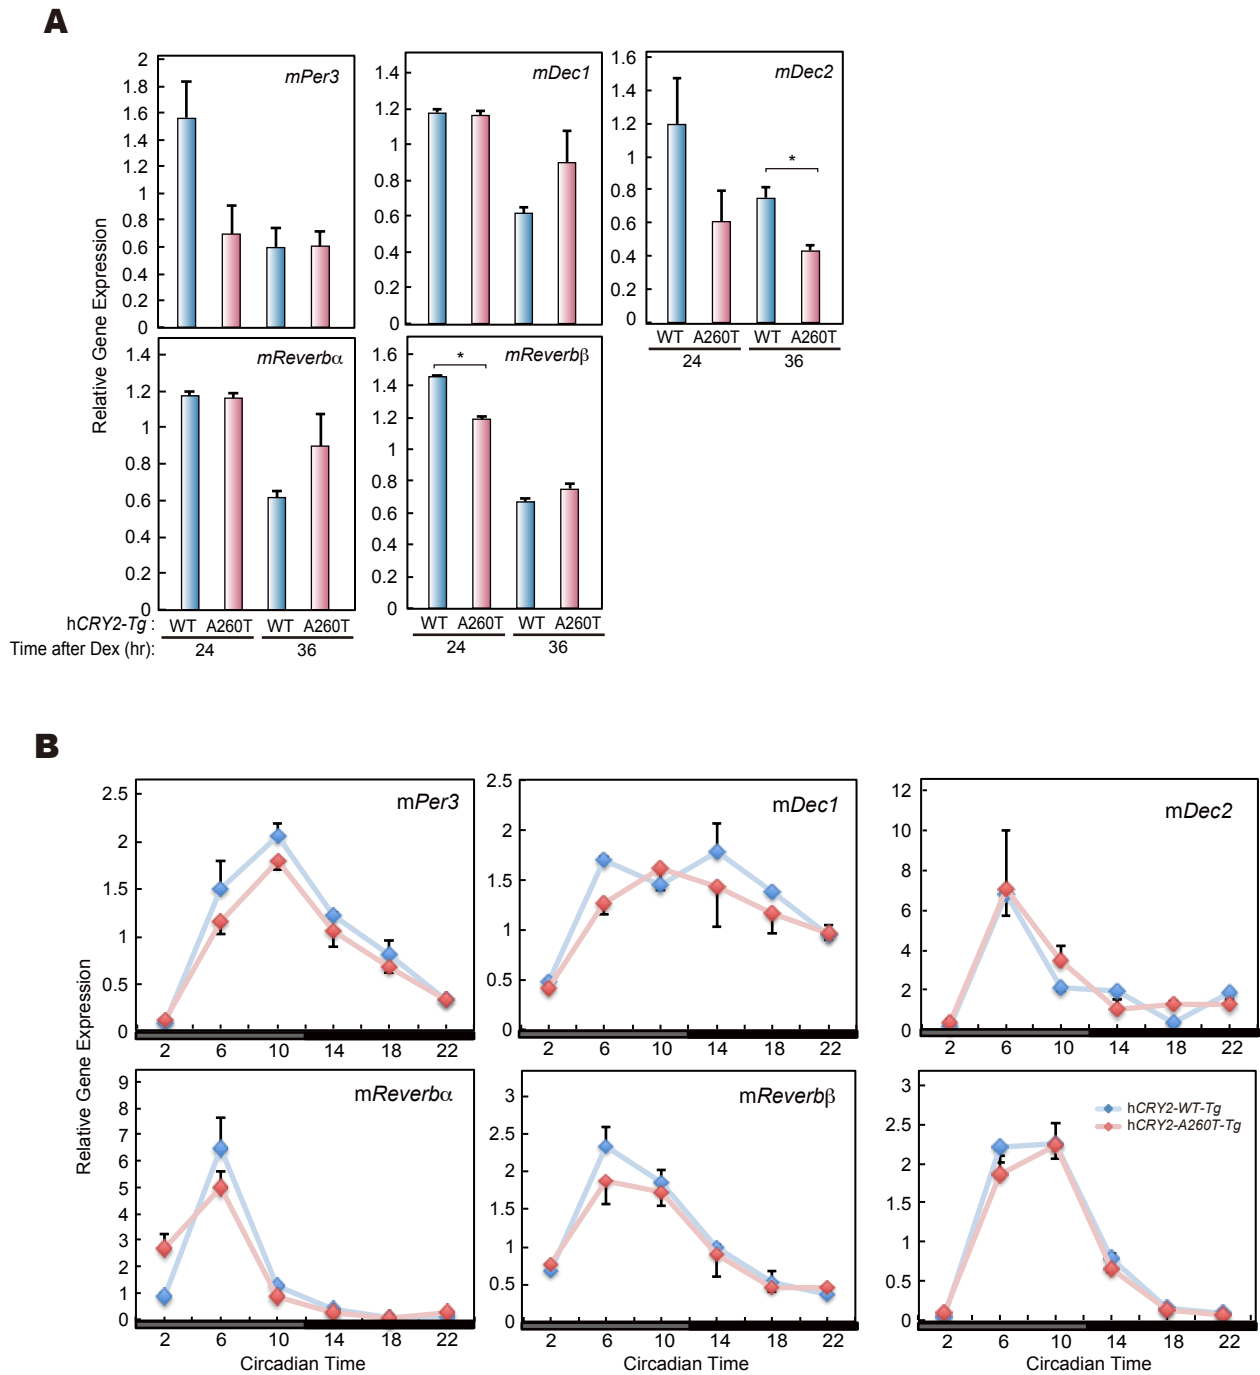

**Figure 6 - supplement 1**

Supplement: supp [file elife_poa_e16695_Figure6_Supplement1.pdf › elife_poa_e16695_Figure6_Supplement1.pdf]
